Development 139, 826 (2012) doi:10.1242/dev.078257  
© 2012. Published by The Company of Biologists Ltd

## Shaping sound in space: the regulation of inner ear patterning

**Andrew K. Groves and Donna M. Fekete**

There was an error in *Development* **139**, 245-257.

On p. 252, in the second paragraph of the section ‘Establishing gradients and boundaries in the developing cochlea’, it should read ‘In adults...from high (basal) to low (apical).’

The authors apologise to readers for this mistake.
